# Supplementary material for: Construction and arm evolution of trifunctional phenolic initiator-mediated polycarbonate polyols produced by using a double metal cyanide catalyst
Source: Royal Society of Chemistry journal article supplement (doi:10.1039/d3py00009e), 2023-01-01
Supplement: d3py00009e1.pdf [file d3py00009e1.pdf]

## SUPPORTING INFORMATION

### Construction and Arm Evolution of Trifunctional Phenolic Initiator-Mediated Polycarbonate Polyols Produced by Using Double Metal Cyanide Catalyst

Xiao Zhang,<sup>a</sup> Jincheng Dong,<sup>a</sup> Yun Su,<sup>a</sup> Eun Gyeong Lee,<sup>b</sup> Zhongyu Duan,<sup>a</sup> Il Kim<sup>\*,b</sup> and Binyuan Liu<sup>\*,a</sup>

---

<sup>a</sup> Hebei Key Laboratory of Functional Polymer, School of Chemical Engineering and Technology, Hebei University of Technology, Tianjin 300130, China. E-mail: byliu@hebut.edu.cn.

<sup>b</sup> School of Chemical Engineering, Pusan National University, Busan 46241, Korea. E-mail: ilkim@pusan.ac.kr.

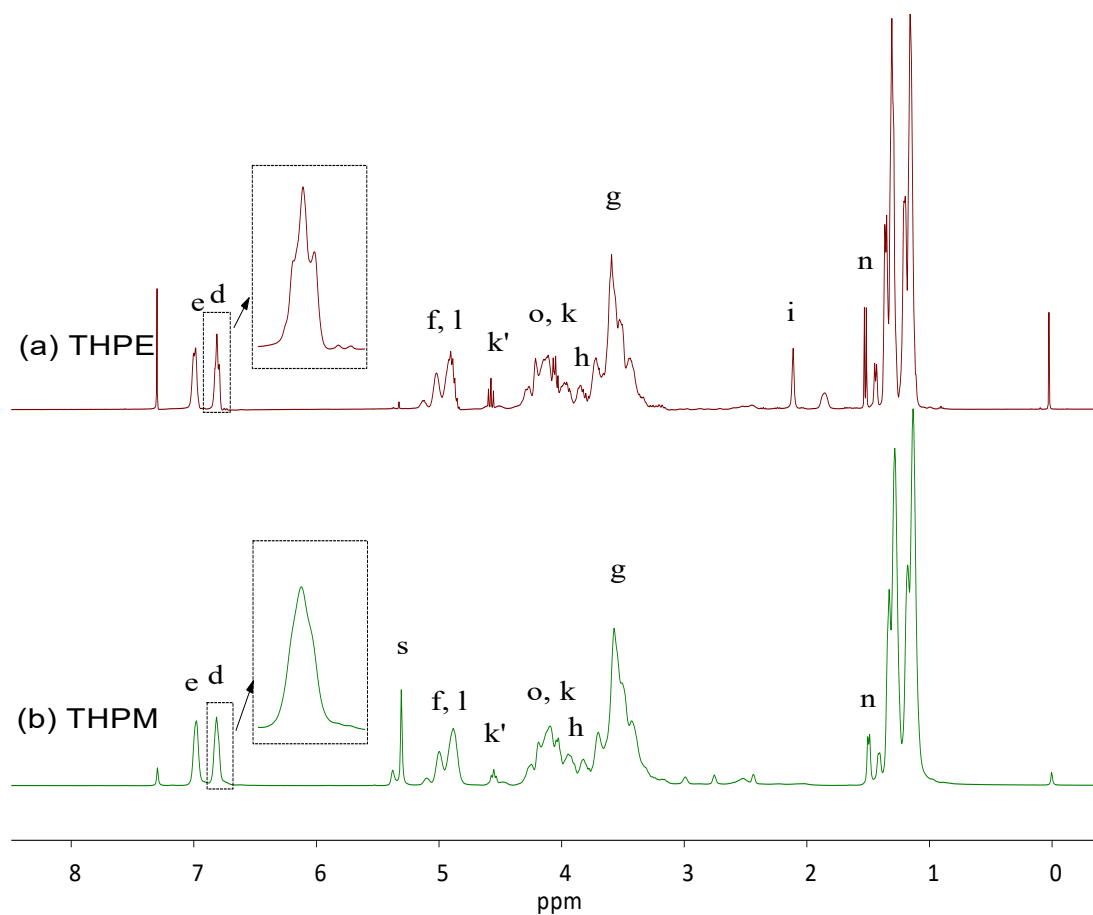

**Figure S1.**  $^1\text{H}$  NMR spectra of poly(carbonate-ether) polyols prepared using THPE and THPM as initiators (Entries 1 and 2, Table 1).

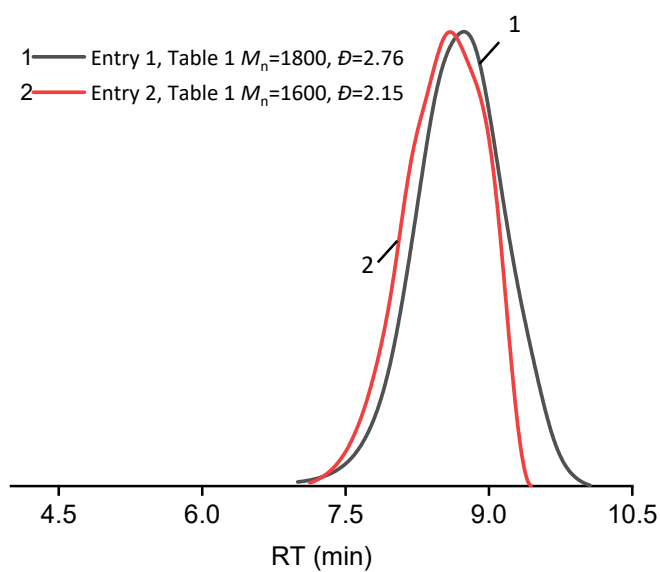

**Figure S2.** GPC plots of poly(carbonate-ether) polyols prepared using THPE and THPM as starters (Entries 1 and 2, Table 1).

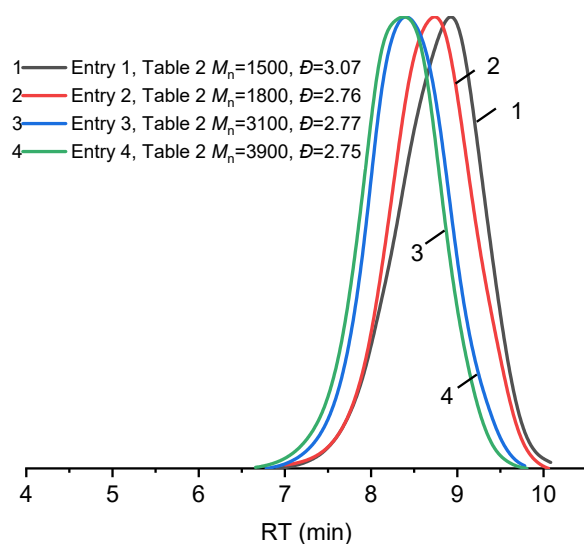

**Figure S3.** GPC curves of products obtained by using different dosages of THPE (Entries 1–4, Table 2).

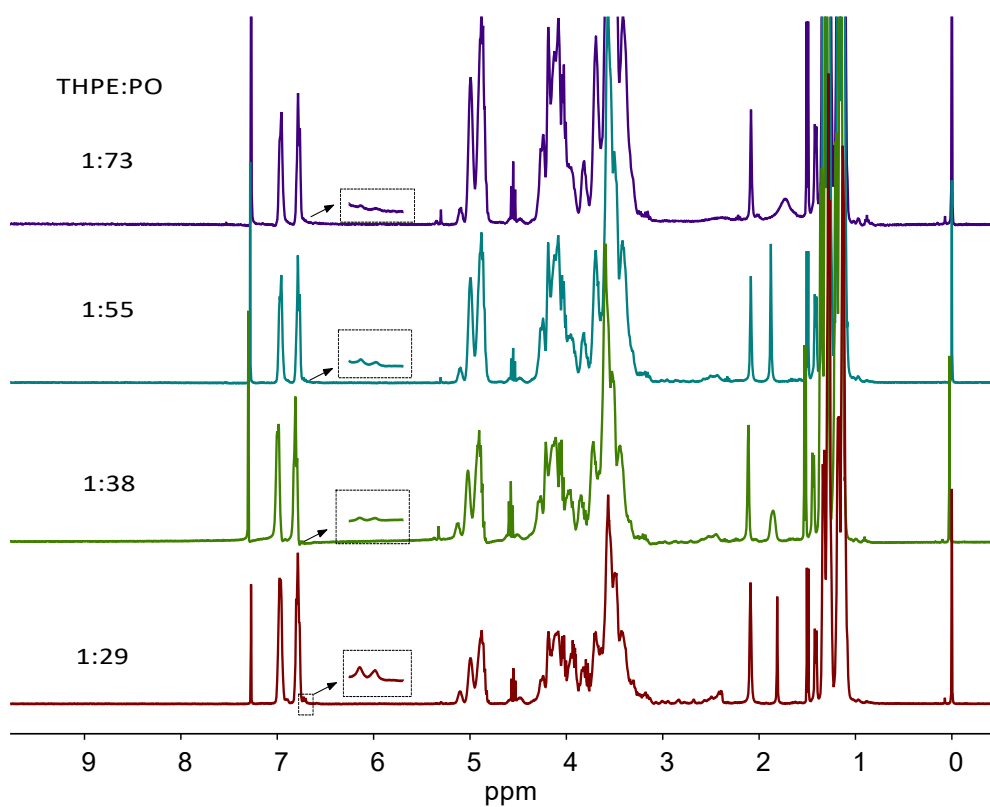

**Figure S4.**  $^1\text{H}$  NMR spectra of products obtained by using different dosages of THPE (Entries 1–4, Table 2).

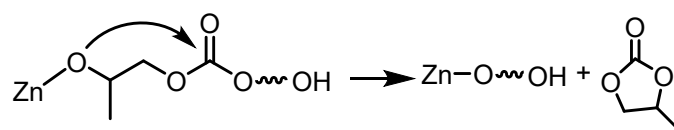

**Figure S5.** Plausible mechanism of backbite.

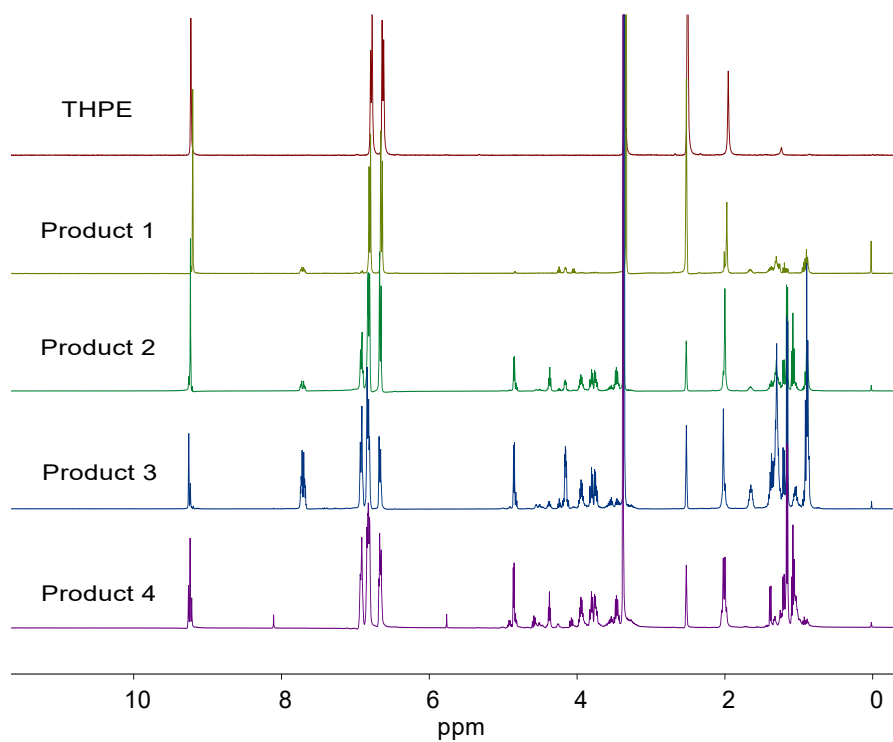

**Figure S6.**  $^1\text{H}$  NMR (DMSO) spectra of the three different species (Products 1–3 ) separated from the  $\text{CH}_2\text{Cl}_2$  insoluble sample and  $^1\text{H}$  NMR spectrum of the  $\text{CH}_2\text{Cl}_2$  soluble sample (Product 4). Copolymerizations were carried out at  $95\text{ }^\circ\text{C}$ , 4 MPa with PO (50 mL, 41.5 g, 0.72 mol), 13 mg DMC,  $n_{\text{THPE}}:n_{\text{PO}}=1:38$  (5.8 g THPE).

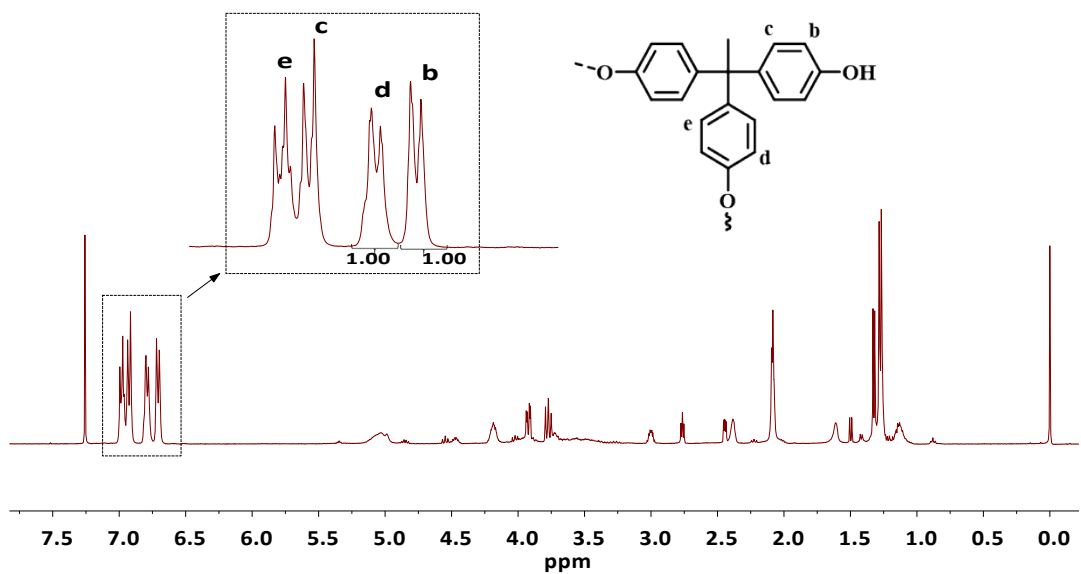

**Figure S7.**  $^1\text{H}$  NMR( $\text{CDCl}_3$ ) spectrum of the product taken at 50 min of reaction.

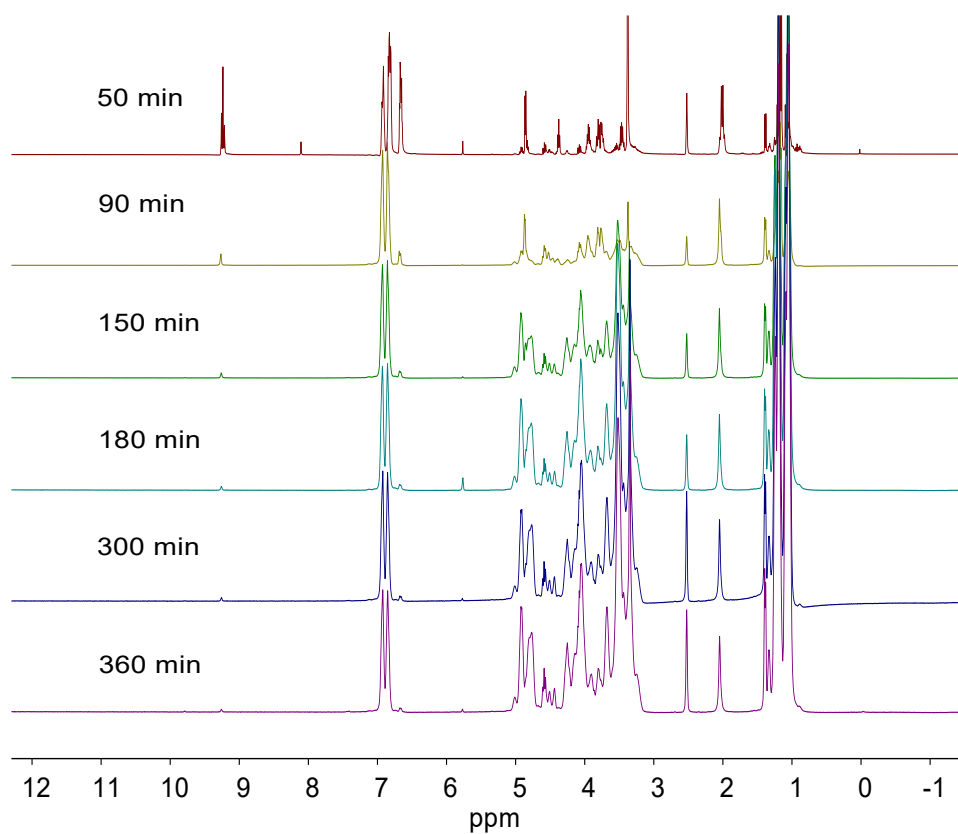

**Figure S8.**  $^1\text{H}$  NMR (DMSO) spectra of the products collected at different reaction periods. Copolymerizations were carried out at  $95\text{ }^\circ\text{C}$ , 4 MPa with PO (50 mL, 41.5 g, 0.72 mol), 13 mg DMC,  $n_{\text{THPE}}:n_{\text{PO}}=1:38$  (5.8 g THPE).

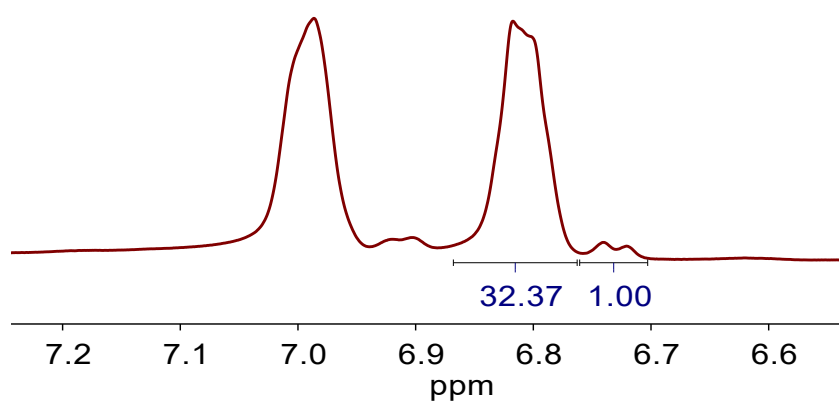

**Figure S9.** The  $^1\text{H}$  NMR spectrum ( $\text{CDCl}_3$ ) of the product collected at 70 min of polymerization. Copolymerizations were carried out at  $95^\circ\text{C}$ , 4 MPa with 18 mg DMC, PO (50 mL, 41.5 g, 0.72 mol),  $n_{\text{THPE}}:n_{\text{PO}}=1:38$  (5.8 g THPE).

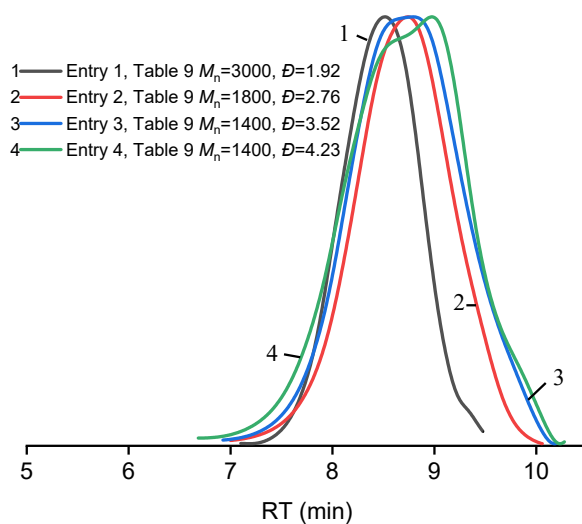

**Figure S10.** GPC curves of products obtained by using different dosages of DMC catalyst (Entries 1–4, Table 9).

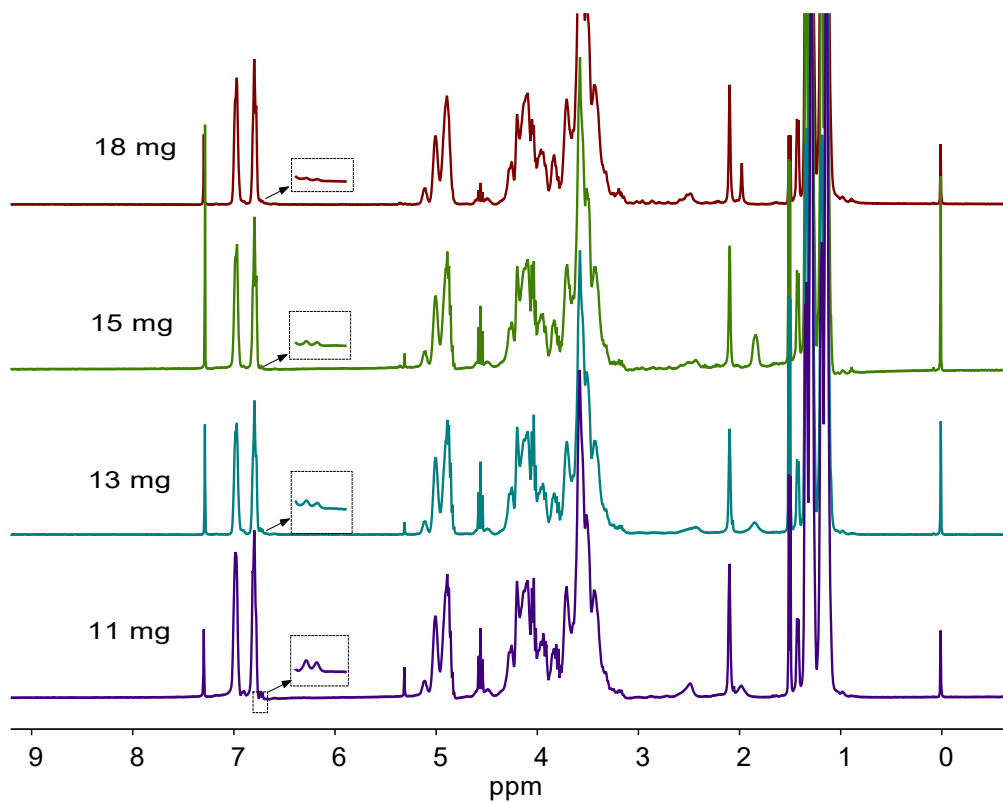

**Figure S11.**  $^1\text{H}$  NMR spectra of products obtained by using different dosages of DMC catalyst (Entries 1–4, Table 9).

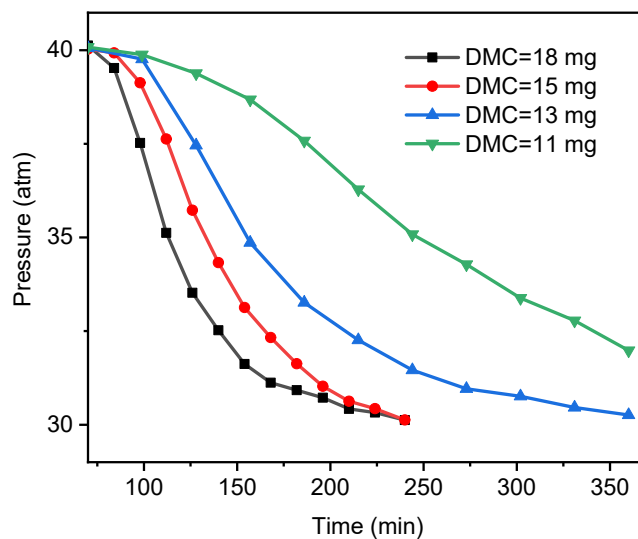

**Figure S12.** The variation of  $\text{CO}_2$  pressure during the copolymerization under different dosages of DMC catalyst (Entries 1–4, Table 9).

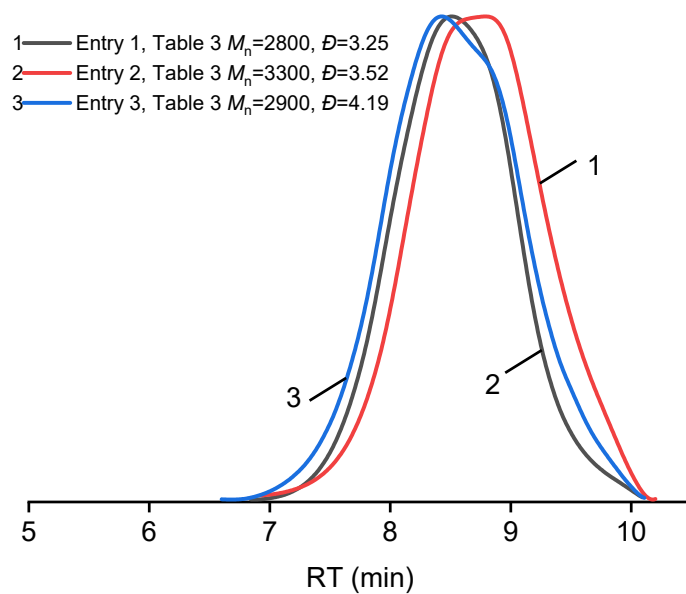

**Figure S13.** GPC curves of products obtained by using different temperatures (Entries 1–3, Table 10).

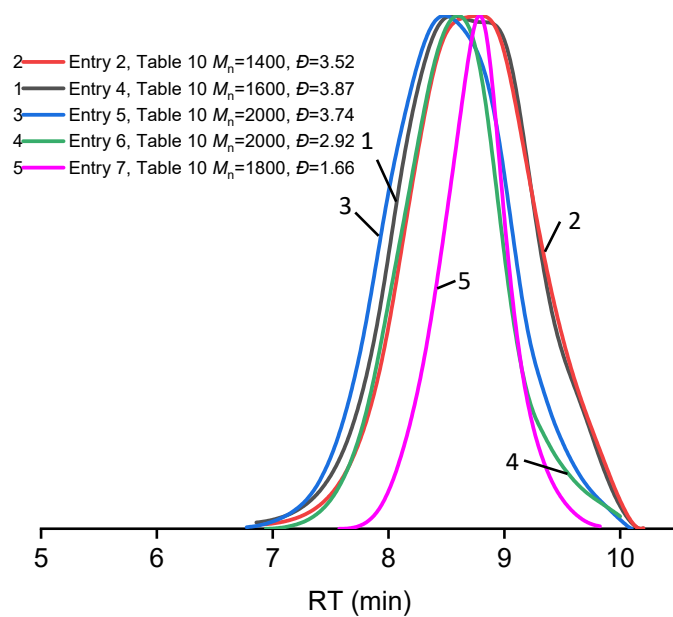

**Figure S14.** GPC curves of products obtained by using different pressures of CO<sub>2</sub> (Entries 2, 4–7, Table 10).



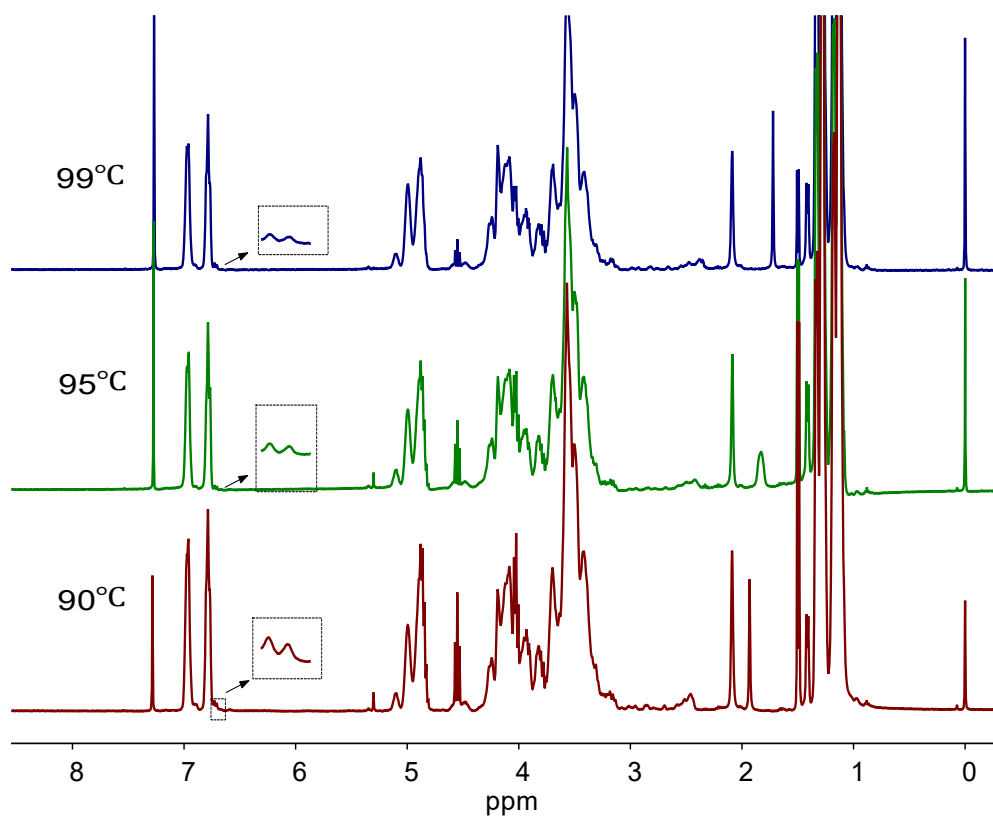

**Figure S15.**  $^1\text{H}$  NMR spectra of products obtained by using different temperatures (Entries 1–3, Table 10).

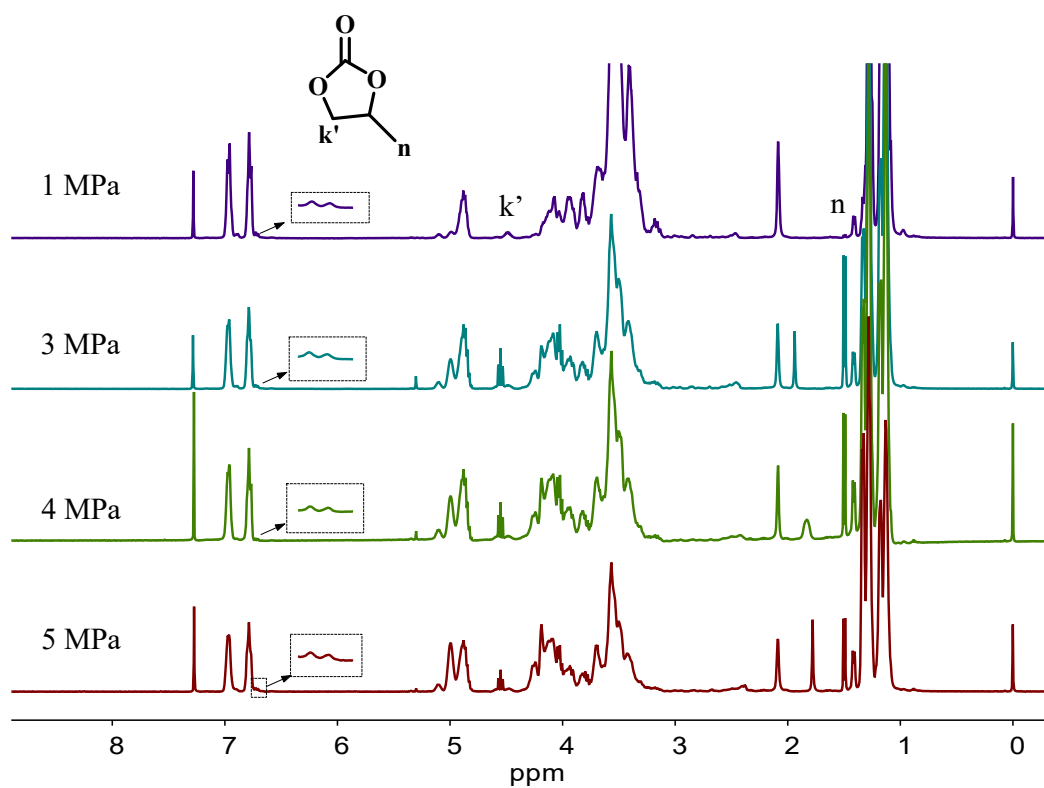

**Figure S16.**  $^1\text{H}$  NMR spectra of products obtained by using different pressures of  $\text{CO}_2$  (Entries 2, 4–6, Table 10).

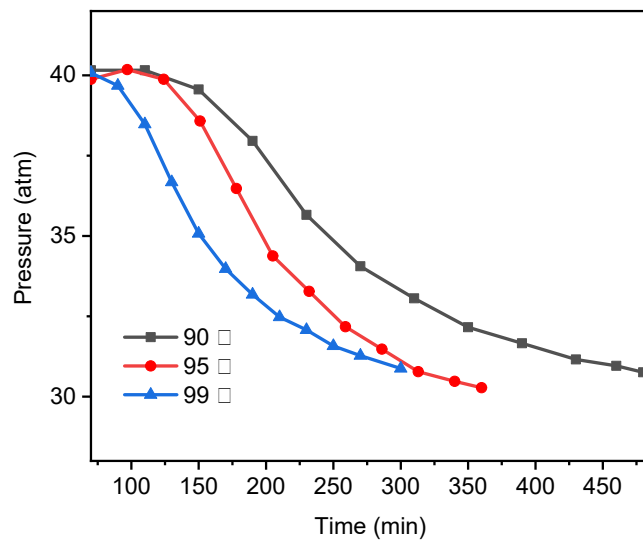

**Figure S17.** The variation of CO<sub>2</sub> pressure during the copolymerizations under different temperatures (Entries 1–3, Table 10).

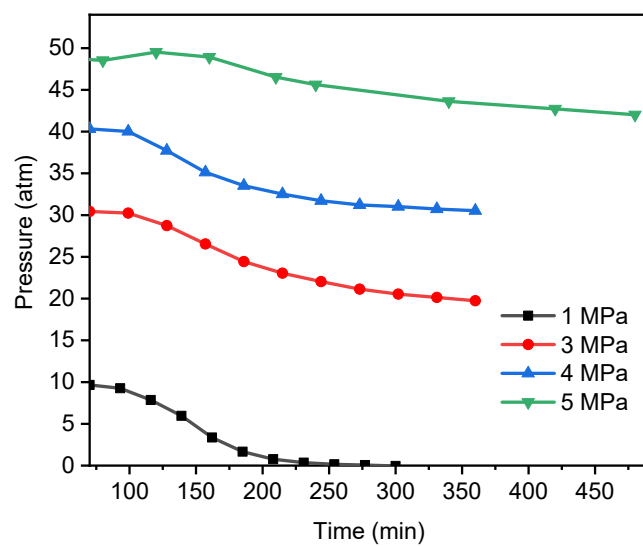

**Figure S18.** The variation of CO<sub>2</sub> pressure during the copolymerizations under different CO<sub>2</sub> pressures (Entries 2, 4-6, Table 10).

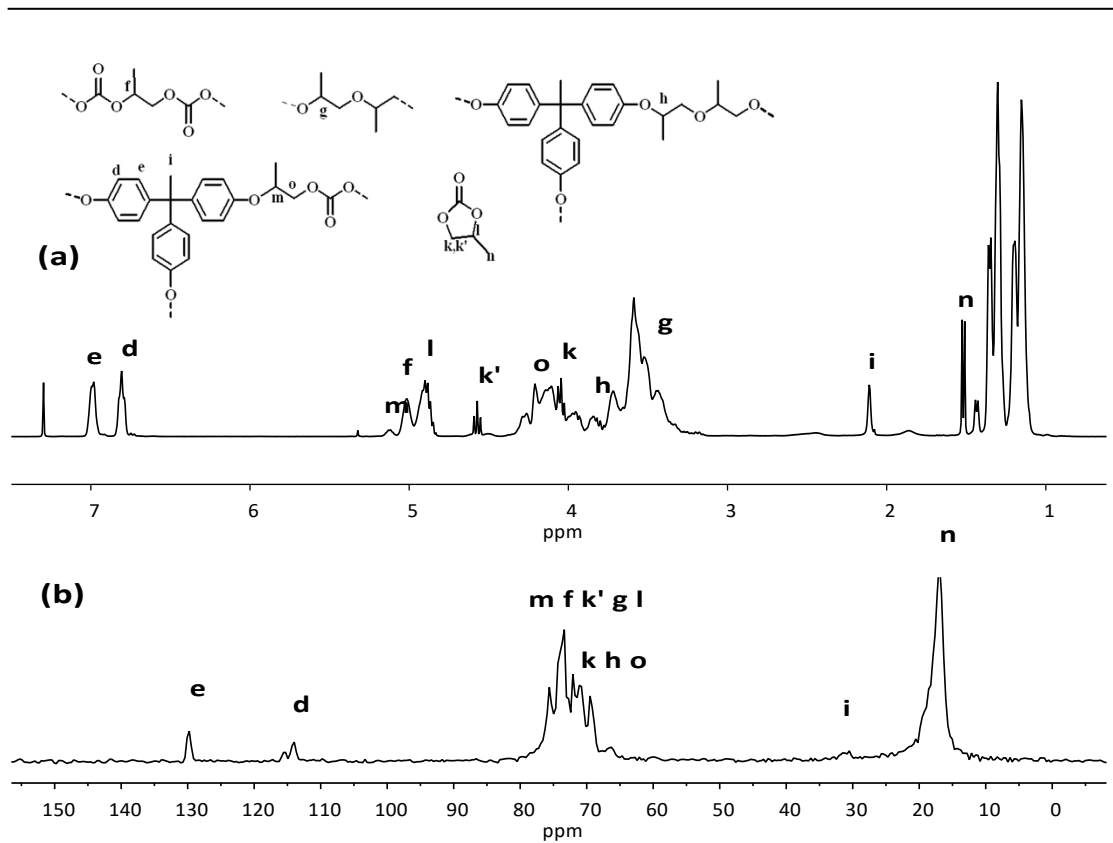

**Figure S19.**  $^1\text{H}$  and  $^{13}\text{C}$  NMR (CDCl<sub>3</sub>) spectra of the product (Entry 3, Table 9). Copolymerizations were carried out at 95 °C, 4 MPa with 13 mg DMC PO (50 mL, 41.5 g, 0.72 mol),  $n_{\text{THPE}}:n_{\text{PO}}=1:38$  (5.8 g THPE).
